# Supplementary material for: Tracking coverage, dropout and multidimensional equity gaps in immunisation systems in West Africa, 2000–2017
Source: PubMed Central journal article supplement (PMC6747924; doi:10.1136/bmjgh-2019-001713), 2019-09-06
Supplement: bmjgh-2019-001713supp001.pdf [file bmjgh-2019-001713supp001.pdf]

|                                                                                                                                                                                                |   |
|------------------------------------------------------------------------------------------------------------------------------------------------------------------------------------------------|---|
| <b>Supplementary Table 1:</b> Trends in Bacillus Calmette-Guerin (BCG) immunization coverage in West African countries from 2000 to 2017 in percentage.....                                    | 2 |
| <b>Supplementary Table 2:</b> Trends in Diphtheria-Pertussis-Tetanus-3 (DTP3) containing vaccine coverage in West African countries from 2000 to 2017 in percentage.....                       | 3 |
| <b>Supplementary Table 3:</b> Vaccination utilization (DTP1-DTP3 dropout in percentage) trends in West Africa from 2000 to 2017 in percentages .....                                           | 4 |
| <b>Supplementary Table 4:</b> BCG immunization coverage in percentages (%) by background characteristics among children 12-23 months across West African Countries (2005-2017) .....           | 5 |
| <b>Supplementary Table 5:</b> DTP3-containing vaccine coverage in percentages (%) by background characteristics among children 12-23 months across West African Countries (2005-2017) .....    | 6 |
| <b>Supplementary Table 6:</b> Vaccine utilization (DTP1-DTP3 dropout) in percentages by background characteristics among children 12-23 months across West African Countries (2005-2017) ..... | 7 |

**Supplementary Table 1: Trends in Bacillus Calmette-Guerin (BCG) immunization coverage in West African countries from 2000 to 2017 in percentage**

| Country                | 2000 | 2001 | 2002 | 2003 | 2004 | 2005 | 2006 | 2007 | 2008 | 2009 | 2010 | 2011 | 2012 | 2013 | 2014 | 2015 | 2016 | 2017 |
|------------------------|------|------|------|------|------|------|------|------|------|------|------|------|------|------|------|------|------|------|
| Benin                  | 92   | 91   | 90   | 90   | 89   | 88   | 93   | 97   | 96   | 93   | 90   | 88   | 96   | 95   | 96   | 96   | 96   | 96   |
| Burkina Faso           | 81   | 80   | 90   | 83   | 99   | 99   | 99   | 99   | 99   | 99   | 99   | 99   | 96   | 96   | 98   | 98   | 98   | 98   |
| Cabo Verde             | 96   | 96   | 97   | 98   | 99   | 99   | 99   | 99   | 99   | 99   | 99   | 99   | 99   | 94   | 99   | 94   | 96   | 98   |
| Cote d'Ivoire          | 80   | 80   | 79   | 78   | 71   | 85   | 77   | 94   | 91   | 95   | 91   | 74   | 93   | 90   | 84   | 79   | 95   | 92   |
| Gambia, The            | 99   | 99   | 99   | 99   | 99   | 99   | 97   | 97   | 95   | 94   | 92   | 90   | 98   | 98   | 96   | 98   | 98   | 94   |
| Ghana                  | 99   | 94   | 92   | 92   | 92   | 99   | 99   | 99   | 99   | 99   | 99   | 98   | 98   | 98   | 99   | 97   | 94   | 99   |
| Guinea                 | 81   | 81   | 80   | 80   | 79   | 80   | 81   | 84   | 87   | 91   | 93   | 82   | 77   | 71   | 66   | 72   | 72   | 72   |
| Guinea Bissau          | 77   | 79   | 82   | 84   | 87   | 89   | 90   | 92   | 93   | 94   | 93   | 92   | 94   | 94   | 94   | 94   | 94   | 94   |
| Liberia                | 78   | 73   | 69   | 64   | 60   | 76   | 77   | 77   | 85   | 87   | 73   | 85   | 85   | 87   | 73   | 74   | 97   | 87   |
| Mali                   | 69   | 75   | 82   | 74   | 76   | 83   | 86   | 86   | 86   | 84   | 82   | 84   | 77   | 70   | 73   | 73   | 73   | 73   |
| Niger                  | 50   | 53   | 56   | 58   | 61   | 64   | 69   | 73   | 78   | 86   | 81   | 53   | 85   | 41   | 83   | 88   | 91   | 91   |
| Nigeria                | 44   | 41   | 38   | 42   | 45   | 49   | 52   | 53   | 65   | 76   | 62   | 57   | 51   | 51   | 51   | 53   | 53   | 53   |
| Senegal                | 89   | 89   | 70   | 77   | 95   | 92   | 94   | 96   | 98   | 97   | 97   | 97   | 97   | 97   | 95   | 95   | 97   | 99   |
| Sierra Leone           | 74   | 63   | 76   | 89   | 86   | 85   | 83   | 82   | 91   | 96   | 97   | 97   | 98   | 99   | 90   | 90   | 92   | 90   |
| Togo                   | 84   | 83   | 81   | 79   | 91   | 96   | 96   | 91   | 92   | 91   | 97   | 97   | 97   | 97   | 79   | 86   | 79   | 75   |
| <b>Regional Median</b> | 79.5 | 80.2 | 80.9 | 81.2 | 83.6 | 86.6 | 86.8 | 88.7 | 90.7 | 91.8 | 89.9 | 86.9 | 90.3 | 86.5 | 86.1 | 86.4 | 88.0 | 87.7 |

Data Source: Data source: WHO/UNICEF Estimates of National Immunization Coverage.

**Supplementary Table 2: Trends in Diphtheria-Pertussis-Tetanus-3 (DTP3) containing vaccine coverage in West African countries from 2000 to 2017 in percentage**

| Country                | 2000 | 2001 | 2002 | 2003 | 2004 | 2005 | 2006 | 2007 | 2008 | 2009 | 2010 | 2011 | 2012 | 2013 | 2014 | 2015 | 2016 | 2017 |
|------------------------|------|------|------|------|------|------|------|------|------|------|------|------|------|------|------|------|------|------|
| <b>Benin</b>           | 78   | 76   | 75   | 73   | 72   | 70   | 74   | 82   | 75   | 79   | 76   | 75   | 80   | 77   | 78   | 82   | 82   | 82   |
| <b>Burkina Faso</b>    | 45   | 62   | 69   | 79   | 79   | 82   | 86   | 89   | 93   | 92   | 91   | 91   | 90   | 88   | 91   | 91   | 91   | 91   |
| <b>Cabo Verde</b>      | 90   | 90   | 91   | 92   | 93   | 95   | 96   | 98   | 99   | 99   | 99   | 90   | 94   | 93   | 95   | 93   | 96   | 96   |
| <b>Cote d'Ivoire</b>   | 65   | 66   | 64   | 61   | 67   | 76   | 77   | 76   | 74   | 81   | 85   | 62   | 82   | 75   | 73   | 80   | 82   | 84   |
| <b>Gambia, The</b>     | 80   | 87   | 87   | 87   | 87   | 95   | 95   | 95   | 96   | 98   | 97   | 96   | 98   | 97   | 96   | 97   | 95   | 92   |
| <b>Ghana</b>           | 88   | 79   | 78   | 80   | 80   | 84   | 84   | 94   | 93   | 94   | 94   | 91   | 92   | 90   | 98   | 88   | 93   | 99   |
| <b>Guinea</b>          | 46   | 50   | 53   | 57   | 60   | 59   | 57   | 63   | 60   | 57   | 64   | 63   | 53   | 44   | 34   | 45   | 45   | 45   |
| <b>Guinea Bissau</b>   | 49   | 53   | 57   | 60   | 64   | 68   | 71   | 74   | 77   | 80   | 83   | 86   | 87   | 87   | 87   | 87   | 87   | 87   |
| <b>Liberia</b>         | 46   | 42   | 39   | 35   | 31   | 60   | 60   | 65   | 75   | 81   | 70   | 77   | 80   | 76   | 50   | 52   | 79   | 86   |
| <b>Mali</b>            | 43   | 49   | 61   | 63   | 69   | 77   | 78   | 74   | 74   | 73   | 73   | 66   | 65   | 64   | 66   | 66   | 66   | 66   |
| <b>Niger</b>           | 34   | 36   | 39   | 41   | 43   | 45   | 51   | 57   | 67   | 71   | 70   | 75   | 71   | 70   | 75   | 75   | 80   | 81   |
| <b>Nigeria</b>         | 29   | 27   | 25   | 29   | 33   | 36   | 40   | 42   | 53   | 63   | 54   | 48   | 42   | 43   | 43   | 42   | 42   | 42   |
| <b>Senegal</b>         | 52   | 52   | 60   | 73   | 87   | 84   | 89   | 94   | 88   | 86   | 89   | 92   | 91   | 92   | 89   | 89   | 93   | 93   |
| <b>Sierra Leone</b>    | 44   | 38   | 53   | 73   | 65   | 65   | 64   | 64   | 77   | 84   | 86   | 89   | 91   | 92   | 83   | 86   | 84   | 90   |
| <b>Togo</b>            | 64   | 50   | 59   | 72   | 71   | 82   | 84   | 82   | 81   | 78   | 83   | 85   | 84   | 84   | 87   | 88   | 89   | 90   |
| <b>Regional Median</b> | 58   | 60.2 | 64.1 | 67.4 | 68.6 | 73.3 | 74.7 | 77.7 | 79.7 | 81.1 | 80.9 | 79.8 | 80.9 | 79.4 | 77.7 | 78.2 | 80.8 | 82.4 |

Data Source: Data source: WHO/UNICEF Estimates of National Immunization Coverage.

Supplementary Table 3: Vaccination utilization (DTP1-DTP3 dropout in percentage) trends in West Africa from 2000 to 2017

| Country                | 2000 | 2001 | 2002 | 2003 | 2004 | 2005 | 2006 | 2007 | 2008 | 2009 | 2010 | 2011 | 2012 | 2013 | 2014 | 2015 | 2016 | 2017 |
|------------------------|------|------|------|------|------|------|------|------|------|------|------|------|------|------|------|------|------|------|
| Benin                  | 11   | 12   | 12   | 13   | 13   | 14   | 15   | 12   | 16   | 10   | 11   | 10   | 9    | 9    | 8    | 4    | 4    | 4    |
| Burkina Faso           | 52   | 31   | 20   | 11   | 11   | 9    | 5    | 3    | 4    | 1    | 2    | 2    | 4    | 6    | 4    | 4    | 4    | 4    |
| Cabo Verde             | 4    | 4    | 4    | 3    | 3    | 2    | 2    | 1    | 0    | 0    | 0    | 9    | 4    | 0    | 4    | 4    | 0    | 1    |
| Cote d'Ivoire          | 20   | 15   | 12   | 10   | 6    | 7    | 18   | 17   | 15   | 14   | 10   | 13   | 11   | 14   | 20   | 19   | 16   | 15   |
| Gambia, The            | 17   | 10   | 9    | 10   | 9    | 0    | 3    | 3    | 0    | 0    | 2    | 3    | 1    | 2    | 2    | 2    | 4    | 1    |
| Ghana                  | 8    | 2    | 6    | 7    | 8    | 4    | 3    | 2    | 3    | 2    | 2    | 3    | 0    | 4    | 1    | 9    | 1    | 0    |
| Guinea                 | 15   | 14   | 15   | 14   | 15   | 16   | 18   | 13   | 4    | 19   | 22   | 13   | 17   | 20   | 24   | 18   | 18   | 18   |
| Guinea Bissau          | 24   | 23   | 22   | 21   | 20   | 18   | 17   | 15   | 14   | 12   | 11   | 9    | 8    | 8    | 8    | 8    | 8    | 8    |
| Liberia                | 34   | 34   | 34   | 34   | 34   | 15   | 15   | 15   | 10   | 9    | 10   | 9    | 12   | 21   | 24   | 25   | 20   | 13   |
| Mali                   | 18   | 29   | 26   | 28   | 25   | 19   | 13   | 15   | 11   | 9    | 8    | 14   | 10   | 5    | 7    | 7    | 7    | 7    |
| Niger                  | 12   | 12   | 12   | 12   | 13   | 12   | 12   | 11   | 9    | 10   | 13   | 11   | 16   | 18   | 17   | 14   | 12   | 12   |
| Nigeria                | 13   | 15   | 18   | 16   | 13   | 12   | 9    | 10   | 10   | 10   | 6    | 8    | 9    | 6    | 5    | 7    | 7    | 7    |
| Senegal                | 27   | 27   | 10   | 8    | 8    | 13   | 10   | 3    | 6    | 8    | 7    | 5    | 5    | 4    | 5    | 5    | 3    | 4    |
| Sierra Leone           | 20   | 20   | 36   | 17   | 17   | 15   | 15   | 13   | 7    | 10   | 9    | 8    | 7    | 6    | 5    | 9    | 13   | 8    |
| Togo                   | 16   | 13   | 16   | 11   | 12   | 9    | 7    | 12   | 11   | 15   | 14   | 9    | 10   | 10   | 4    | 4    | 4    | 2    |
| <b>Regional Median</b> | 18.8 | 15.7 | 15.3 | 13.8 | 13.1 | 10.7 | 10.6 | 9.6  | 7.9  | 8.5  | 8.5  | 8.5  | 8.2  | 8.8  | 9.1  | 9.1  | 7.9  | 6.6  |

Data Source: Data source: WHO/UNICEF Estimates of National Immunization Coverage

**Supplementary Table 4: BCG immunization coverage in percentages (%) by background characteristics among children 12-23 months across West African Countries 2005-2017**

| Country              | Sex    |      | Residence |       | Maternal Education |            | Wealth Quintile |         | Regions |         | Overall     | Data source  |
|----------------------|--------|------|-----------|-------|--------------------|------------|-----------------|---------|---------|---------|-------------|--------------|
|                      | Female | Male | Rural     | Urban | None               | Secondary+ | Poorest         | Richest | Lowest  | Highest |             |              |
| <b>Benin</b>         | 89.4   | 90.1 | 88.5      | 91.5  | 86.0               | 99.5       | 74.9            | 98.2    | 73.7    | 96.9    | <b>89.8</b> | MICS 2014    |
| <b>Burkina Faso</b>  | 98.0   | 97.0 | 96.0      | 98.5  | 95.9               | 99.1       | 91.6            | 98.5    | 90.0    | 100.0   | <b>96.5</b> | DHS 2010     |
| <b>Cabo Verde</b>    | 96.0   | 97.1 | 93.7      | 99.1  | 88.8               | 100.0      | *               | *       | 75.0    | 100.0   | <b>96.5</b> | DHS 2005     |
| <b>Cote d'Ivoire</b> | 78.6   | 78.1 | 70.3      | 90.4  | 71.6               | 92.9       | 61.5            | 93.2    | 58.2    | 87.3    | <b>78.3</b> | MICS 2016    |
| <b>Gambia, The</b>   | 98.3   | 99.4 | 99.5      | 98.1  | 99.0               | 98.4       | 99.0            | 97.7    | 95.1    | 100.0   | <b>98.9</b> | DHS 2013     |
| <b>Ghana</b>         | 97.2   | 96.3 | 96.4      | 97.2  | 93.0               | 99.0       | 95.7            | 98.9    | 92.1    | 100.0   | <b>96.8</b> | DHS 2014     |
| <b>Guinea</b>        | 69.6   | 73.3 | 62.3      | 88.3  | 65.2               | 95.0       | 45.9            | 92.2    | 52.1    | 92.9    | <b>71.5</b> | MICS 2016    |
| <b>Guinea Bissau</b> | 93.5   | 93.5 | 91.1      | 97.4  | 90.7               | 98.7       | 89.4            | 89.6    | 87.2    | 99.1    | <b>93.5</b> | MICS 2014    |
| <b>Liberia</b>       | 94.7   | 93.1 | 90.7      | 96.7  | 89.5               | 98.7       | 86.8            | 98.9    | 78.9    | 97.9    | <b>93.9</b> | DHS 2013     |
| <b>Mali</b>          | 72.3   | 72.9 | 69.8      | 84.7  | 68.9               | 90.6       | 56.7            | 91.0    | 41.3    | 93.6    | <b>72.6</b> | MICS 2015    |
| <b>Niger</b>         | 83.9   | 84.1 | 82.1      | 95.1  | 82.3               | 99.4       | 74.9            | 93.2    | 74.6    | 96.1    | <b>84.0</b> | DHS 2012     |
| <b>Nigeria</b>       | 53.0   | 54.0 | 43.0      | 75.0  | 23.9               | 93.9       | 23.2            | 87.1    | 30.0    | 85.6    | <b>53.5</b> | MICS 2016/17 |
| <b>Senegal</b>       | 95.4   | 95.2 | 93.4      | 98.4  | 93.5               | 98.6       | 95.8            | 93.0    | 65.8    | 100.0   | <b>95.3</b> | DHS 2017     |
| <b>Sierra Leone</b>  | 96.7   | 96.4 | 96.3      | 96.9  | 96.1               | 98.1       | 96.7            | 97.8    | 91.8    | 100.0   | <b>96.5</b> | MICS 2017    |
| <b>Togo</b>          | 96.0   | 94.5 | 93.7      | 97.9  | 92.1               | 98.9       | 93.4            | 98.4    | 90.6    | 98.4    | <b>95.3</b> | DHS 2013/14  |

+The latest available nationally representative survey data used. **DHS**= Demographic and Health Survey, **MICS**= Multiple Indicator Cluster survey. \*No data reported for wealth quintile

**Supplementary Table 5: DTP3-containing vaccine coverage in percentages (%) by background characteristics among children 12-23 months across West African Countries 2005-2017**

| Country       | Sex    |      | Residence |       | Maternal Education |            | Wealth Quintile |         | Regions |         | Overall     | Data source  |
|---------------|--------|------|-----------|-------|--------------------|------------|-----------------|---------|---------|---------|-------------|--------------|
|               | Female | Male | Rural     | Urban | None               | Secondary+ | Poorest         | Richest | Lowest  | Highest |             |              |
| Benin         | 72.8   | 74.5 | 71.9      | 75.8  | 69.4               | 94.4       | 59.8            | 88.8    | 61.6    | 84.6    | <b>73.6</b> | MIC 2014     |
| Burkina Faso  | 88.8   | 90.3 | 89.1      | 91.5  | 88.8               | 93.6       | 83.4            | 92.9    | 88.0    | 93.7    | <b>89.5</b> | DHS 2010     |
| Cabo Verde    | 79.7   | 89.2 | 85        | 83.9  | 55.1               | 90.4       | *               | *       | 75.0    | 93.1    | <b>84.4</b> | DHS 2005     |
| Cote d'Ivoire | 67.5   | 68.3 | 64.4      | 73.2  | 60.2               | 81.9       | 55.6            | 85.6    | 51.7    | 79.3    | <b>67.9</b> | MICS 2016    |
| Gambia, The   | 86.2   | 89.1 | 90.9      | 84.0  | 89.6               | 84.9       | 90.0            | 82.7    | 76.1    | 96.5    | <b>87.7</b> | DHS 2013     |
| Ghana         | 90.3   | 86.9 | 88.8      | 88.1  | 86.7               | 94.3       | 87.4            | 91.9    | 80.7    | 96.7    | <b>88.5</b> | DHS 2014     |
| Guinea        | 37.6   | 41.4 | 31.4      | 54.5  | 32.5               | 66.0       | 17.9            | 63.6    | 17.5    | 60.8    | <b>39.6</b> | MICS 2016    |
| Guinea Bissau | 82.9   | 83.0 | 80.1      | 87.5  | 78.0               | 93.5       | 74.6            | 90.5    | 72.2    | 98.2    | <b>82.9</b> | MICS 2014    |
| Liberia       | 73.8   | 69.2 | 75.7      | 66.6  | 67.9               | 81.5       | 57.9            | 79.4    | 52.0    | 81.5    | <b>71.4</b> | DHS 2013     |
| Mali          | 56.2   | 54.9 | 52.6      | 67.7  | 51.9               | 79.2       | 39.6            | 76.0    | 21.0    | 80.5    | <b>55.5</b> | MICS 2015    |
| Niger         | 68.6   | 67.5 | 64.9      | 86.3  | 65.4               | 90.1       | 52.4            | 76.0    | 52.4    | 87.2    | <b>68.1</b> | DHS 2012     |
| Nigeria       | 34.1   | 32.6 | 25.3      | 50.8  | 8.9                | 73.8       | 10.2            | 63.3    | 13.7    | 66.4    | <b>33.3</b> | MICS 2016/17 |
| Senegal       | 91.9   | 92.0 | 89.6      | 95.8  | 89.4               | 97.3       | 86.9            | 88.8    | 60.2    | 98.8    | <b>92.0</b> | DHS 2017     |
| Sierra Leone  | 85.1   | 84.6 | 85.1      | 84.3  | 83.2               | 91.6       | 84.7            | 91.2    | 79.1    | 92.2    | <b>84.9</b> | MICS 2017    |
| Togo          | 81.4   | 84.2 | 81.2      | 85.5  | 75.4               | 88.4       | 84.0            | 90.9    | 75.3    | 95.2    | <b>82.8</b> | DHS 2013/14  |

+The latest available nationally representative survey data used. **DHS**= Demographic and Health Survey, **MICS**= Multiple Indicator Cluster survey. \*No data reported for wealth quintile

**Supplementary Table 6: Vaccine utilization (DTP1-DTP3 dropout) in percentages by background characteristics among children 12-23 months across West African Countries 2005-2017**

| Countries            | Sex    |      | Residence |       | Maternal Education |            | Wealth Quintile |         | Regions |         | Overall     | Data source  |
|----------------------|--------|------|-----------|-------|--------------------|------------|-----------------|---------|---------|---------|-------------|--------------|
|                      | Female | Male | Rural     | Urban | None               | Secondary+ | Poorest         | Richest | Lowest  | Highest |             |              |
| <b>Benin</b>         | 13.5   | 11.5 | 12.7      | 12.3  | 13                 | 5.4        | 11.6            | 7.9     | 11.8    | 14.4    | <b>12.6</b> | MIC 2014     |
| <b>Burkina Faso</b>  | 4.9    | 4.7  | 4.9       | 4.7   | 4.8                | 6.4        | 7.3             | 4.3     | 2.4     | 2.5     | <b>4.7</b>  | DHS 2010     |
| <b>Cabo Verde</b>    | 13     | 6.1  | 6.7       | 12.1  | 33.7               | 9.6        | *               | *       | 0       | 8.7     | <b>9.6</b>  | DHS 2005     |
| <b>Cote d'Ivoire</b> | 15.5   | 13.3 | 14        | 14.9  | 17.6               | 9.2        | 15.8            | 4.9     | 17.3    | 21      | <b>7.6</b>  | MICS 2016    |
| <b>Gambia, The</b>   | 11.7   | 9.1  | 7.6       | 13.5  | 8.9                | 13.2       | 8.2             | 15      | 16.6    | 3.1     | <b>10.4</b> | DHS 2013     |
| <b>Ghana</b>         | 7      | 9.1  | 8.4       | 7.8   | 8.4                | 3.1        | 8.4             | 6.6     | 5.3     | 11.3    | <b>8.1</b>  | DHS 2014     |
| <b>Guinea</b>        | 25.2   | 22.5 | 22.7      | 25.8  | 22.9               | 26.6       | 17.9            | 25.9    | 21.9    | 26.6    | <b>23.8</b> | MICS 2016    |
| <b>Guinea Bissau</b> | 11.2   | 10.5 | 12.1      | 8.9   | 13.2               | 3.7        | 15.3            | 5.4     | 14.9    | 0       | <b>10.9</b> | MICS 2014    |
| <b>Liberia</b>       | 18.9   | 20.9 | 20.8      | 19.1  | 20.1               | 15.3       | 26.1            | 16.7    | 22.9    | 18.2    | <b>19.9</b> | DHS 2013     |
| <b>Mali</b>          | 17.1   | 17   | 17.5      | 14.1  | 16.8               | 9          | 16.5            | 11.1    | 9.8     | 9.4     | <b>17.1</b> | MICS 2015    |
| <b>Niger</b>         | 17.1   | 18.6 | 19.7      | 7.6   | 18.9               | 9.5        | 25.6            | 18.1    | 14.4    | 7.5     | <b>18.1</b> | DHS 2012     |
| <b>Nigeria</b>       | 13.6   | 17.2 | 14        | 18.5  | 10.3               | 18.5       | 9.4             | 19      | 11.6    | 15.2    | <b>15.4</b> | MICS 2016/17 |
| <b>Senegal</b>       | 4.9    | 4.2  | 6         | 2.2   | 1.1                | 5.7        | 9.5             | 4.3     | 10.5    | 1.8     | <b>4.5</b>  | DHS 2017     |
| <b>Sierra Leone</b>  | 9.7    | 9.2  | 9.4       | 11.4  | 10.1               | 5.7        | 10.4            | 5.9     | 11.9    | 6.1     | <b>5.9</b>  | MICS 2017    |
| <b>Togo</b>          | 12.9   | 7.9  | 9.7       | 11.4  | 13                 | 9.3        | 8.6             | 6.7     | 12.9    | 3       | <b>10.4</b> | DHS 2013/14  |

+The latest available nationally representative survey data used. **DHS**= Demographic and Health Survey, **MICS**= Multiple Indicator Cluster survey. \*No data reported for wealth quintile
